# Supplementary material for: Differential Expression of Yersinia pseudotuberculosis General Porin Genes during Short- and Long-Term Antibiotic Stresses
Source: MDPI journal article supplement (doi:10.3390/molecules26133956), 2021-06-28
Supplement: s1 [file s1]

# Supplementary materials

## “Differential expression of *Yersinia pseudotuberculosis* porin genes during short- and long-term antibiotic stresses”

Evgeniya Bystritskaya <sup>1</sup>, Nadezhda Chernysheva <sup>1</sup>, Anna Stenkova <sup>2</sup>, Konstantin Guzev <sup>1</sup>, Alexander Rakin <sup>3</sup>, and Marina Isaeva <sup>1,2,\*</sup>

<sup>1</sup> G.B. Elyakov Pacific Institute of Bioorganic Chemistry, Far Eastern Branch, Russian Academy of Sciences, 159, Pr. 100 let Vladivostoku, Vladivostok 690022, Russia; belyjane@gmail.com (E.B.); chernysheva.nadezhda@gmail.com (N.C.); k.guzev@gmail.com (K.G.)

<sup>2</sup> Far Eastern Federal University, School of Biomedicine, 8 Sukhanova St., Vladivostok 690090, Russia; stenkova@gmail.com (A.S.)

<sup>3</sup> Friedrich-Loeffler-Institut, Federal Research Institute for Animal Health, Institute for Bacterial Infections and Zoonoses, Naumburger Str. 96a, D-07743 Jena, Germany; [rakin@gmx.de](mailto:rakin@gmx.de) (A.R.)

\* Correspondence: [issaeva@gmail.com](mailto:issaeva@gmail.com); Tel.: +7-423-231-11-68

Submitted to Molecules.

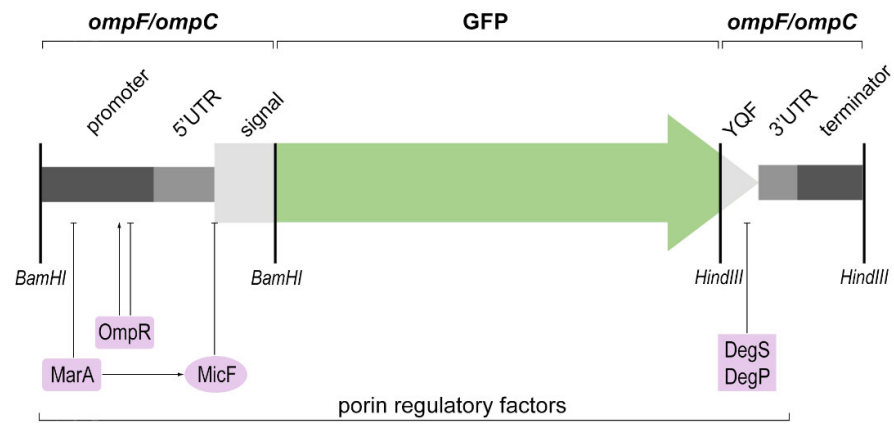

**Figure S1.** GFP-reporter constructions.

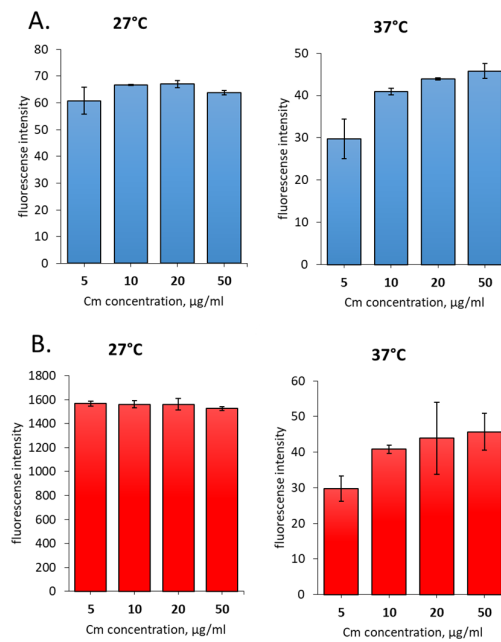

**Figure S2.** GFP fluorescence intensity in *Y. pseudotuberculosis* 488 transformed with *ompC/ompF* promoter-fused GFP reporter constructs under increasing chloramphenicol exposure. (A) *ompC*-GFP, (B) *ompF*-GFP. All results are expressed as the mean  $\pm$  standard deviation between three experimental trials.

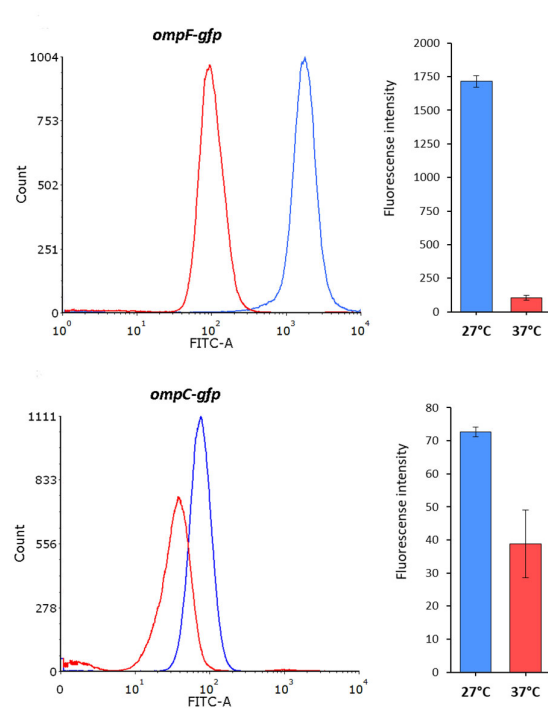

**Figure S3.** GFP fluorescence intensity in *Y. pseudotuberculosis* 488 transformed with *ompF/ompC* promoter-fused GFP reporter constructs at 27 °C and 37 °C incubation temperature. All results are expressed as the mean  $\pm$  standard deviation between three experimental trials. The histograms from a single representative experiment are shown.

**Table S1.** MIC of antibiotics against *Y. pseudotuberculosis* 488.

| Antibiotic           | Class           | MIC (µg/ml) at 27 °C | MIC (µg/ml) at 37 °C |
|----------------------|-----------------|----------------------|----------------------|
| kanamycin (Km)       | aminoglycosides | 4.0                  | 2.0                  |
| tetracycline (Tet)   | polyketides     | 1.0                  | 0.5                  |
| carbenicillin (Cb)   | β-lactams       | 1.0                  | 1.0                  |
| chloramphenicol (Cm) | amphenicols     | 1.0                  | 1.0                  |

**Table S2.** Nucleotide sequences of *Y. pseudotuberculosis* 488 genes used in the study (attached in Excel file).**Table S3.** Oligonucleotide primers used in the study.

| Experiment                               | Primer name   | Sequence                              | Function                       |
|------------------------------------------|---------------|---------------------------------------|--------------------------------|
| qRT-PCR                                  | OmpF-F        | 5'-CAAGACGGCAACGCAAC-3'               | <i>ompF</i> fragment           |
|                                          | OmpF-R        | 5'-ATGAATCACCACCGAACACT-3'            | amplification                  |
|                                          | OmpC-F        | 5'-GACGGGAACCACGACAGT-3'              | <i>ompC</i> fragment           |
|                                          | OmpC-R        | 5'-TGACAGGAAGTTATCAGCACC-3'           | amplification                  |
|                                          | 16SRT-F       | 5'-ATTTAGCCGAGATGCTTTAG-3'            | 16S rDNA                       |
|                                          | 16SRT-R       | 5'-CTTGATTTCCACCATTACG-3'             | fragment                       |
|                                          |               |                                       | amplification                  |
|                                          | MarA47-F      | 5'-CGCTCTTCTGTATGGCGAT-3'             | <i>marA47</i> fragment         |
|                                          | MarA47-R      | 5'-TAAACGCTCTTCTGCCCCCTG-3'           | amplification                  |
|                                          | MarA48-F      | 5'-CGGAGAAAGATGACGAGCAAG-3'           | <i>marA48</i> fragment         |
|                                          | MarA48-R      | 5'-CAGAGCCAACTGAGGCAGAA-3'            | amplification                  |
|                                          | OmpR-F        | 5'-CAAGGTTTTTCAGGTCCGCAG-3'           | <i>ompR</i> fragment           |
|                                          | OmpR-R        | 5'-ACGGTCCACTTCTTCGCCTT-3'            | amplification                  |
|                                          | OmpX-F        | 5'-TGGGTCATGGTCGTTTCACC-3'            | <i>ompX</i> fragment           |
|                                          | OmpX-R        | 5'-TTGCGGATACGGCTCTGCTC-3'            | amplification                  |
|                                          | LamB-F        | 5'-CCAATAGCACTGGCTGTTGCCG-3'          | <i>lamB</i> fragment           |
|                                          | LamB-R        | 5'-TGTTGTTCAACCACCGCTTGCCGT-3'        | amplification                  |
|                                          | OmpA-F        | 5'-GGGTGGTTTAGTATGGCGTG-3'            | <i>ompA</i> fragment           |
|                                          | OmpA-R        | 5'-AACACCAACACTCAGGAGGC-3'            | amplification                  |
|                                          | OmpY-F        | 5'-GCCACACTGGGTATCATTC-3'             | <i>ompY</i> fragment           |
|                                          | OmpY-R        | 5'-AATAGGTATTTTCGACGAAC-3'            | amplification                  |
| fluorescent reporter system construction | OmpF-Bam_for  | 5'-ttaggatccACGCACGCCGAGAAATGCCA-3'   | <i>ompF</i> promoter           |
|                                          | OmpF-Bam_rev  | 5'-ttaggatccAGCTGGGATTACTACTGCAA-3'   | amplification                  |
|                                          | OmpF-Hind_for | 5'-ttaaagcttGTCAAACCTAACGAGGCAGTT-3'  | <i>ompF</i> terminator         |
|                                          | OmpF-Hind_rev | 5'-ttaaagcttGGCCGATAGACAGAGTAATCT-3'  | amplification                  |
|                                          | OmpC-Bam_for  | 5'-ttaggatccGTCAATTTGTGCTAATCATAT-3'  | <i>ompC</i> promoter           |
|                                          | OmpC-Bam_rev  | 5'-ttaggatccAATAATGAATGAAAGAACTCGA-3' | amplification                  |
|                                          | OmpC-Hind_for | 5'-ttaaagcttTTCTGATTATAGGCGTGAGT-3'   | <i>ompC</i> terminator         |
|                                          | OmpC-Hind_rev | 5'-ttaaagcttGTGAAATCATCACGATGGTGT-3'  | amplification                  |
| porin gene sequencing                    | pACYCSal_seq  | 5'-ATAAGTGCGGCGACGATAGT-3'            | sequencing of reporter inserts |
|                                          | pACYCEcV_seq  | 5'-AGGCATAGGCTTGTTAT-3'               |                                |
|                                          | 227-F         | 5'-GTCTGGGCTTGTGCTGCTC-3'             |                                |
|                                          | OmpF-R        | 5'-ACGGTCCACTTCTTCGCCTT-3'            | <i>ompF</i>                    |
|                                          | OmpC-2F       | 5'-ATGGCAGCAGTAGTGAAACC-3'            |                                |
|                                          | OmpC-2R       | 5'-TAGGCATTGGCACGCTTA-3'              | <i>ompC</i>                    |

**Table S4.** Average Ct values for *ompF*, *ompC* and 16S rRNA of *Y. pseudotuberculosis* 488.

| Condition                      |                 | 16S rRNA average Ct value | <i>ompF</i> average Ct value | <i>ompC</i> average Ct value |
|--------------------------------|-----------------|---------------------------|------------------------------|------------------------------|
| short-term antibiotic exposure |                 |                           |                              |                              |
| 27 °C                          | control 1       | 19.040±0.057              | 18.840±0.170                 | 17.545±0.177                 |
|                                | control 2       | 19.240±0.127              | 19.080±0.240                 | 17.965±0.290                 |
|                                | control 3       | 19.220±0.156              | 18.960±0.170                 | 18.080±0.042                 |
|                                | Km treatment 1  | 18.950±0.141              | 20.420±0.240                 | 19.285±0.247                 |
|                                | Km treatment 2  | 18.355±0.205              | 19.930±0.170                 | 19.220±0.184                 |
|                                | Km treatment 3  | 18.350±0.057              | 20.290±0.042                 | 19.440±0.184                 |
|                                | Tet treatment 1 | 18.670±0.057              | 19.840±0.141                 | 18.350±0.184                 |
|                                | Tet treatment 2 | 18.260±0.042              | 19.995±0.049                 | 18.430±0.113                 |
|                                | Tet treatment 3 | 17.990±0.085              | 19.795±0.035                 | 18.375±0.120                 |
|                                | Cb treatment 1  | 18.550±0.212              | 19.120±0.212                 | 19.395±0.007                 |
|                                | Cb treatment 2  | 18.215±0.148              | 18.915±0.177                 | 18.055±0.205                 |
|                                | Cb treatment 3  | 17.700±0.100              | 19.220±0.042                 | 16.805±0.134                 |
|                                | Cm treatment 1  | 18.535±0.332              | 18.370±0.297                 | 19.250±0.141                 |
|                                | Cm treatment 2  | 18.305±0.205              | 18.520±0.127                 | 18.700±0.085                 |
|                                | Cm treatment 3  | 18.285±0.092              | 18.820±0.100                 | 19.190±0.085                 |
| 37 °C                          | control 1       | 17.240±0.099              | 19.590±0.099                 | 16.665±0.092                 |
|                                | control 2       | 17.775±0.177              | 19.715±0.134                 | 16.690±0.170                 |
|                                | control 3       | 17.290±0.056              | 19.570±0.085                 | 16.685±0.092                 |
|                                | Km treatment 1  | 16.580±0.127              | 20.555±0.290                 | 16.840±0.057                 |
|                                | Km treatment 2  | 17.100±0.099              | 21.440±0.226                 | 17.405±0.120                 |
|                                | Km treatment 3  | 17.375±0.205              | 21.710±0.297                 | 17.865±0.092                 |
|                                | Tet treatment 1 | 16.290±0.085              | 19.585±0.092                 | 18.060±0.113                 |
|                                | Tet treatment 2 | 16.815±0.049              | 20.105±0.120                 | 17.675±0.191                 |
|                                | Tet treatment 3 | 16.775±0.092              | 20.280±0.127                 | 18.245±0.120                 |
|                                | Cb treatment 1  | 16.245±0.148              | 19.090±0.113                 | 16.140±0.198                 |
|                                | Cb treatment 2  | 15.765±0.148              | 19.480±0.156                 | 15.180±0.240                 |
|                                | Cb treatment 3  | 16.805±0.106              | 21.495±0.120                 | 16.675±0.148                 |
|                                | Cm treatment 1  | 16.875±0.106              | 19.260±0.269                 | 18.655±0.106                 |
|                                | Cm treatment 2  | 16.900±0.014              | 19.880±0.141                 | 17.880±0.184                 |
|                                | Cm treatment 3  | 16.995±0.064              | 20.335±0.205                 | 18.550±0.113                 |
| long-term antibiotic exposure  |                 |                           |                              |                              |
| 27 °C                          | control 1       | 16.725±0.247              | 23.590±0.113                 | 22.540±0.057                 |
|                                | control 2       | 16.965±0.247              | 24.225±0.007                 | 23.160±0.071                 |
|                                | control 3       | 16.710±0.240              | 23.945±0.064                 | 22.805±0.064                 |
|                                | Km treatment 1t | 16.350±0.198              | 23.275±0.021                 | 23.280±0.042                 |
|                                | Km treatment 2  | 16.750±0.141              | 23.410±0.000                 | 23.035±0.078                 |
|                                | Km treatment 3  | 16.525±0.134              | 23.375±0.035                 | 23.710±0.042                 |
|                                | Tet treatment 1 | 17.260±0.170              | 22.635±0.035                 | 23.310±0.099                 |
|                                | Tet treatment 2 | 17.380±0.226              | 23.305±0.134                 | 23.175±0.092                 |
|                                | Tet treatment 3 | 17.455±0.177              | 23.590±0.085                 | 23.485±0.092                 |
|                                | Cb treatment 1  | 17.260±0.085              | 23.445±0.021                 | 23.165±0.021                 |
|                                | Cb treatment 2  | 17.465±0.035              | 24.395±0.007                 | 23.435±0.0919                |
|                                | Cb treatment 3  | 17.390±0.113              | 24.090±0.028                 | 23.330±0.014                 |
|                                | Cm treatment 1  | 16.990±0.085              | 22.500±0.000                 | 23.265±0.049                 |
|                                | Cm treatment 2  | 17.435±0.332              | 23.250±0.0424                | 22.920±0.000                 |
|                                | Cm treatment 3  | 17.195±0.106              | 23.055±0.049                 | 23.145±0.120                 |
| 37 °C                          | control 1       | 17.245±0.106              | 25.880±0.014                 | 21.560±0.014                 |
|                                | control 2       | 17.315±0.049              | 25.975±0.078                 | 21.490±0.057                 |
|                                | control 3       | 17.405±0.092              | 26.020±0.071                 | 21.645±0.049                 |
|                                | Km treatment 1t | 17.470±0.000              | 26.375±0.064                 | 22.285±0.007                 |
|                                | Km treatment 2  | 17.280±0.170              | 25.865±0.035                 | 21.915±0.078                 |
|                                | Km treatment 3  | 17.315±0.092              | 26.030±0.071                 | 22.085±0.064                 |
|                                | Tet treatment 1 | 17.700±0.071              | 26.795±0.120                 | 22.355±0.021                 |
|                                | Tet treatment 2 | 17.635±0.064              | 25.865±0.148                 | 22.835±0.035                 |
|                                | Tet treatment 3 | 17.340±0.099              | 25.990±0.042                 | 22.375±0.049                 |
|                                | Cb treatment 1  | 17.675±0.219              | 26.250±0.099                 | 22.160±0.000                 |
|                                | Cb treatment 2  | 16.975±0.035              | 27.145±0.021                 | 22.365±0.021                 |
|                                | Cb treatment 3  | 17.485±0.106              | 28.180±0.010                 | 22.975±0.120                 |
|                                | Cm treatment 1  | 17.205±0.191              | 25.785±0.318                 | 22.305±0.078                 |
|                                | Cm treatment 2  | 17.390±0.156              | 25.415±0.078                 | 21.900±0.057                 |
|                                | Cm treatment 3  | 17.085±0.106              | 25.335±0.163                 | 21.980±0.099                 |

Km – kanamycin, Tet – tetracycline, Cb – carbenicillin, Cm – chloramphenicol.
